# Supplementary material for: How to Measure Foot Self-Care? A Methodological Review of Instruments
Source: MDPI journal article supplement (doi:10.3390/jpm13030434), 2023-02-28
Supplement: s1 [file s1]

Supplementary Table 2. Methodological quality of included studies (n=53) using MMAT tool.

|       | Reference                              | RCT-quantitative |    |     |     |     |     |     | Non-random quantitative |    |     |     |     |     |     | Quantitative |    |     |     |     |     |     |
|-------|----------------------------------------|------------------|----|-----|-----|-----|-----|-----|-------------------------|----|-----|-----|-----|-----|-----|--------------|----|-----|-----|-----|-----|-----|
|       |                                        | s1               | s2 | 2_1 | 2_2 | 2_3 | 2_4 | 2_5 | s1                      | s2 | 3_1 | 3_2 | 3_3 | 3_4 | 3_5 | s1           | s2 | 4_1 | 4_2 | 4_3 | 4_4 | 4_5 |
| DFSBS | Chin & Huang, 2013 [30]                |                  |    |     |     |     |     |     |                         |    |     |     |     |     |     | Y            | Y  | Y   | Y   | Y   | Y   | Y   |
|       | Bahador et al., 2017 [37]              |                  |    |     |     |     |     |     | Y                       | Y  | Y   | Y   | Y   | N   | Y   |              |    |     |     |     |     |     |
|       | Chin et al., 2014 [45]                 |                  |    |     |     |     |     |     |                         |    |     |     |     |     |     | Y            | Y  | Y   | Y   | Y   | Y   | Y   |
|       | Salameh et al., 2020 [36]              |                  |    |     |     |     |     |     |                         |    |     |     |     |     |     | Y            | Y  | Y   | Y   | Y   | N   | Y   |
|       | Ahmad Sharoni et al., 2017b [39]       |                  |    |     |     |     |     |     |                         |    |     |     |     |     |     | Y            | Y  | Y   | Y   | Y   | Y   | Y   |
|       | Ahmad Sharoni et al., 2017a [38]       |                  |    |     |     |     |     |     | Y                       | Y  | Y   | Y   | Y   | Y   | Y   |              |    |     |     |     |     |     |
|       | Sahin & Cingil, 2020 [40]              |                  |    |     |     |     |     |     |                         |    |     |     |     |     |     | Y            | Y  | Y   | Y   | Y   | N   | Y   |
| SDSCA | Toobert et al., 2000 [31]              |                  |    |     |     |     |     |     |                         |    |     |     |     |     |     | Y            | Y  | Y   | Y   | Y   | Y   | Y   |
|       | Li et al., 2014 [46]                   |                  |    |     |     |     |     |     |                         |    |     |     |     |     |     | Y            | Y  | Y   | Y   | Y   | Y   | Y   |
|       | Al Sayah et al., 2015 [47]             |                  |    |     |     |     |     |     |                         |    |     |     |     |     |     | Y            | Y  | Y   | Y   | Y   | Y   | Y   |
|       | Bell et al., 2005 [48]                 |                  |    |     |     |     |     |     |                         |    |     |     |     |     |     | Y            | Y  | Y   | Y   | Y   | N   | Y   |
|       | Chiwanga, 2015 [12]                    |                  |    |     |     |     |     |     |                         |    |     |     |     |     |     | Y            | Y  | Y   | Y   | Y   | N   | Y   |
|       | Rezende Neta et al., 2015 [49]         |                  |    |     |     |     |     |     |                         |    |     |     |     |     |     | Y            | Y  | Y   | Y   | Y   | N   | Y   |
|       | Jordan & Jordan, 2011 [50]             |                  |    |     |     |     |     |     |                         |    |     |     |     |     |     | Y            | Y  | Y   | Y   | Y   | N   | Y   |
|       | Dikeukwu & Omole, 2013 [41]            |                  |    |     |     |     |     |     |                         |    |     |     |     |     |     | Y            | Y  | Y   | Y   | Y   | Y   | Y   |
|       | Batista et al., 2020 [51]              |                  |    |     |     |     |     |     |                         |    |     |     |     |     |     | Y            | Y  | Y   | Y   | Y   | Y   | Y   |
|       | Lincoln et al., 2007 [32]              |                  |    |     |     |     |     |     |                         |    |     |     |     |     |     | Y            | Y  | Y   | Y   | Y   | Y   | Y   |
| NAFF  | Wendling et al., 2015 [52]             |                  |    |     |     |     |     |     |                         |    |     |     |     |     |     | Y            | Y  | Y   | Y   | Y   | Y   | Y   |
|       | Magbanua & Lim-Alba 2017 [53]          |                  |    |     |     |     |     |     |                         |    |     |     |     |     |     | Y            | Y  | Y   | Y   | Y   | N   | Y   |
|       | Kurup et al., 2019 [54]                |                  |    |     |     |     |     |     |                         |    |     |     |     |     |     | Y            | Y  | Y   | Y   | Y   | N   | Y   |
|       | Abdelhamid et al., 2018 [43]           | Y                | Y  | Y   | Y   | Y   | N   | Y   |                         |    |     |     |     |     |     |              |    |     |     |     |     |     |
|       | Navarro-Flores et al., 2015 [33]       |                  |    |     |     |     |     |     |                         |    |     |     |     |     |     | Y            | Y  | Y   | Y   | Y   | Y   | Y   |
|       | Gonzalez-de la Torre et al., 2020 [55] |                  |    |     |     |     |     |     |                         |    |     |     |     |     |     | Y            | Y  | Y   | Y   | Y   | N   | Y   |
| FSCB  | Vileikyte et al., 2006 [34]            |                  |    |     |     |     |     |     |                         |    |     |     |     |     |     | Y            | Y  | Y   | Y   | Y   | N   | Y   |
|       | Nguyen et al., 2019 [56]               |                  |    |     |     |     |     |     | Y                       | Y  | Y   | Y   | Y   | Y   | Y   |              |    |     |     |     |     |     |
|       | Perrin et al., 2009 [57]               |                  |    |     |     |     |     |     |                         |    |     |     |     |     |     | Y            | Y  | Y   | Y   | Y   | N   | Y   |
|       | Perrin et al., 2014 [58]               |                  |    |     |     |     |     |     |                         |    |     |     |     |     |     | Y            | Y  | Y   | Y   | Y   | N   | Y   |
| FSOG  | Borges & Ostwald, 2008 [35]            | Y                | Y  | Y   | Y   | Y   | Y   | Y   |                         |    |     |     |     |     |     |              |    |     |     |     |     |     |
|       | Gökdeniz & Akgün Şahin, 2020 [59]      |                  |    |     |     |     |     |     |                         |    |     |     |     |     |     | Y            | Y  | Y   | Y   | Y   | N   | Y   |
| Other | Bohorquez Robles et al., 2017 [60]     |                  |    |     |     |     |     |     |                         |    |     |     |     |     |     | Y            | Y  | Y   | Y   | Y   | N   | Y   |

|                                 |   |   |   |   |   |   |   |  |   |   |   |   |   |   |   |   |   |   |   |   |   |   |
|---------------------------------|---|---|---|---|---|---|---|--|---|---|---|---|---|---|---|---|---|---|---|---|---|---|
| Sari et al., 2020 [61]          |   |   |   |   |   |   |   |  |   |   |   |   |   |   |   | Y | Y | Y | Y | Y | N | Y |
| Schmidt et al., 2008 [62]       |   |   |   |   |   |   |   |  |   |   |   |   |   |   |   | Y | Y | Y | Y | Y | N | Y |
| Ahmad Sharoni et al., 2018 [63] | Y | Y | Y | Y | Y | Y | Y |  |   |   |   |   |   |   |   |   |   |   |   |   |   |   |
| Stolt et al., 2012 [64]         |   |   |   |   |   |   |   |  |   |   |   |   |   |   |   | Y | Y | Y | N | N | Y | Y |
| Świątoniowska et al., 2020 [65] |   |   |   |   |   |   |   |  |   |   |   |   |   |   |   | Y | Y | Y | Y | Y | N | Y |
| Thomas et al., 2017 [66]        |   |   |   |   |   |   |   |  |   |   |   |   |   |   |   | Y | Y | Y | Y | Y | N | Y |
| Vatankhah et al., 2009 [67]     |   |   |   |   |   |   |   |  | Y | Y | Y | Y | Y | N | Y |   |   |   |   |   |   |   |
| Kruger & Guthrie, 1992 [68]     |   |   |   |   |   |   |   |  |   |   |   |   |   |   |   | Y | Y | Y | Y | Y | Y | Y |
| Lael-Monfared et al., 2019 [69] |   |   |   |   |   |   |   |  |   |   |   |   |   |   |   | Y | Y | Y | Y | Y | N | Y |
| Corbett, 2003 [70]              | Y | Y | Y | Y | Y | Y | Y |  |   |   |   |   |   |   |   |   |   |   |   |   |   |   |
| Fan et al., 2014 [71]           |   |   |   |   |   |   |   |  | Y | Y | Y | Y | Y | N | Y |   |   |   |   |   |   |   |
| Li et al., 2019 [72]            |   |   |   |   |   |   |   |  | Y | Y | Y | Y | Y | N | Y |   |   |   |   |   |   |   |
| Liang et al., 2012 [73]         |   |   |   |   |   |   |   |  |   |   |   |   |   |   |   | Y | Y | N | N | Y | Y | Y |
| Makiling & Smart, 2020 [74]     |   |   |   |   |   |   |   |  | Y | Y | Y | Y | Y | N | Y |   |   |   |   |   |   |   |
| Olson et al., 2009 [75]         |   |   |   |   |   |   |   |  |   |   |   |   |   |   |   | Y | Y | Y | Y | Y | Y | Y |
| Sable-Morita et al., 2021 [76]  |   |   |   |   |   |   |   |  |   |   |   |   |   |   |   | Y | Y | Y | Y | N | N | Y |
| Hanley et al., 2020 [77]        |   |   |   |   |   |   |   |  |   |   |   |   |   |   |   | Y | Y | Y | Y | Y | Y | Y |
| Ghasemi et al., 2021 [78]       | Y | Y | Y | Y | Y | N | Y |  |   |   |   |   |   |   |   | Y | Y | Y | Y | N | N | Y |
| Rossaneis et al., 2016 [79]     |   |   |   |   |   |   |   |  |   |   |   |   |   |   |   | Y | Y | Y | Y | Y | N | Y |
| Madarshanian et al. 2014 [81]   |   |   |   |   |   |   |   |  |   |   |   |   |   |   |   | Y | Y | Y | Y | N | N | Y |
| Tuha et al., 2021 [82]          |   |   |   |   |   |   |   |  |   |   |   |   |   |   |   | Y | Y | Y | Y | N | N | Y |
| Qasim et al., 2021 [83]         |   |   |   |   |   |   |   |  |   |   |   |   |   |   |   | Y | Y | Y | Y | Y | N | Y |
| Ong et al., 2022 [84]           |   |   |   |   |   |   |   |  |   |   |   |   |   |   |   | Y | Y | Y | Y | N | N | Y |

Y = yes, N = no; DFSBS = Diabetes foot self-care behavior scale, SDSCA = The Summary of Diabetes Self - Care Activities: foot care; NAFF = the Nottingham Assessment of Functional Footcare; DFSQ-UMA = diabetic foot self-care questionnaire of the University of Malaga, Spain; FSCB = Foot Self-Care Behaviour questionnaire; FSOG = The Foot Self-Care Observation Guide
