# Supplementary material for: How to Measure Foot Self-Care? A Methodological Review of Instruments
Source: MDPI journal article supplement (doi:10.3390/jpm13030434), 2023-02-28
Supplement: s1 [file s1]

Supplementary Table 3. Detailed analysis of psychometric evidence of six instruments measuring foot self-care, analysed against the criteria proposed by Zwakhalen and colleagues [28].

| Instrument                                          | Origin of items (0-2)                                                                                                                                                       |   | Num. of particip. (0-2)                              |   | Validity                                                       |                 |                                                                                              |                                               |                                                                                           |                   |                                          |   | Reliability            |                   |                   |   | Total score (0–20) |   |                                              |   |    |
|-----------------------------------------------------|-----------------------------------------------------------------------------------------------------------------------------------------------------------------------------|---|------------------------------------------------------|---|----------------------------------------------------------------|-----------------|----------------------------------------------------------------------------------------------|-----------------------------------------------|-------------------------------------------------------------------------------------------|-------------------|------------------------------------------|---|------------------------|-------------------|-------------------|---|--------------------|---|----------------------------------------------|---|----|
|                                                     |                                                                                                                                                                             |   |                                                      |   | Content (0-2)                                                  | Criterion (0-2) |                                                                                              | Construct I: in relation to other tests (0-2) | Construct II: differentiates (0-2)                                                        | Homogeneity (0-2) |                                          |   | Intra-rater (0-2)      | test-retest (0-2) | Feasibility (0-2) |   |                    |   |                                              |   |    |
| Diabetes foot self-care behavior scale (DFSBS)      |                                                                                                                                                                             |   |                                                      |   |                                                                |                 |                                                                                              |                                               |                                                                                           |                   |                                          |   |                        |                   |                   |   |                    |   |                                              |   |    |
| Diabetes foot self-care behavior scale (DFSBS) [30] | developed and tested in this study, a comprehensive review of the literature to identify diabetic patient foot care guidelines and existing foot self-care behavior scales. | 2 | 295 patients with diabetes and peripheral neuropathy | 2 | experts rated the adequacy and clarity, content validity index | 2               | correlation with Chinese version of the Summary of Diabetes Self-care Activity questionnaire | 2                                             | Exploratory factor analysis, convergent validity analysis, known groups validity analysis | 2                 | item analysis, item discrimination index | 2 | Cronbach's alpha 0.73. | 2                 | N/R               | 0 | N/R                | 0 | A pilot study                                | 2 | 16 |
| Use of DFSBS in Iran [37]                           | N/R                                                                                                                                                                         | 2 | 60 patients with diabetic foot ulcers                | 2 | content validity with ten faculty members                      | 2               | N/R                                                                                          | 0                                             | N/R                                                                                       | 0                 | N/R                                      | 0 | Cronbach's alpha 0.86. | 2                 | N/R               | 0 | N/R                | 0 | N/R                                          | 0 | 8  |
| Use of DFSCBS in Taiwan [45]                        | N/R                                                                                                                                                                         | 2 | 290 patients with diabetes                           | 2 | N/R                                                            | 0               | N/R                                                                                          | 0                                             | N/R                                                                                       | 0                 | N/R                                      | 0 | Cronbach's alpha 0.73  | 2                 | N/R               | 0 | N/R                | 0 | N/R                                          | 0 | 6  |
| Use of DFSBS in State of Palestine [36]             | DFSBS was translated into Arabic                                                                                                                                            | 2 | 413 patients with diabetes                           | 2 | content evaluated by three experts in the field                | 2               | N/R                                                                                          | 0                                             | N/R                                                                                       | 0                 | N/R                                      | 0 | Cronbach's Alpha 0.83  | 2                 | N/R               |   | N/R                | 0 | A pilot study with 10 patients with diabetes | 2 | 10 |

[illegible]

|                                                                                          |                                                                                              |   |                                                                 |   |                                                               |   |                                            |   |                             |   |                                            |   |                              |   |     |   |                         |   |                                      |   |    |
|------------------------------------------------------------------------------------------|----------------------------------------------------------------------------------------------|---|-----------------------------------------------------------------|---|---------------------------------------------------------------|---|--------------------------------------------|---|-----------------------------|---|--------------------------------------------|---|------------------------------|---|-----|---|-------------------------|---|--------------------------------------|---|----|
| the Nottingham Assessment of Functional Footcare, original study [32]                    | previous literature and foot care recommendations and guidelines                             | 2 | 128 patients with and without diabetes                          | 2 | N/R                                                           | 0 | N/R                                        | 0 | N/R                         | 0 | convergent validity                        | 2 | 0.53                         | 1 | N/R | 0 | test-retest             | 2 | pilot                                | 2 | 11 |
| The use of NAFF in United Kingdom [42]                                                   | Refer to original study [32]                                                                 | 2 | 90 patients with diabetes                                       | 2 | N/R                                                           | 0 | N/R                                        | 0 | N/R                         | 0 | convergent validity                        | 2 | 0.61                         | 1 | N/R | 0 | test-retest             | 2 | N/R                                  | 0 | 9  |
| The use of NAFF in United Kingdom [52]                                                   | Refer to original study [32]                                                                 | 2 | 223 patients with diabetes                                      | 2 | N/R                                                           | 0 | N/R                                        | 0 | N/R                         | 0 | N/R                                        | 0 | N/R                          | 0 | N/R | 0 | N/R                     | 0 | N/R                                  | 0 | 4  |
| The use of NAFF in United Kingdom [43]                                                   | a modified version of the Nottingham Assessment of Functional Foot-care questionnaire (NAFF) | 2 | control (n = 35), intervention (n = 35), patients with diabetes | 2 | panel of three experts for assessed face and content validity | 2 | N/R                                        | 0 | N/R                         | 0 | N/R                                        | 0 | Cronbach's alpha 0.891 .     | 2 | N/R | 0 | N/R                     | 0 | N/R                                  | 0 | 8  |
| Diabetic foot self-care questionnaire of the University of Malaga, Spain (DFSQ-UMA)      |                                                                                              |   |                                                                 |   |                                                               |   |                                            |   |                             |   |                                            |   |                              |   |     |   |                         |   |                                      |   |    |
| diabetic foot self-care questionnaire of the University of Malaga, Spain (DFSQ-UMA) [33] | developed in this study based on literature                                                  | 2 | 209 patients with diabetes                                      | 2 | expert panel                                                  | 2 | The correlation with HbA1c was significant | 2 | Exploratory factor analysis | 2 | Inter-item and item-to-total correlations. | 2 | Cronbach's alpha 0.89.       | 2 | N/R | 0 | test-retest reliability | 2 | cognitive interviews of item clarity | 2 | 18 |
| The use of DFSQ-UMA in Spain [55]                                                        | Refer to original study [33]                                                                 | 2 | 182 patients with diabetes                                      | 2 | N/R                                                           | 0 | N/R                                        | 0 | N/R                         | 0 | N/R                                        | 0 | N/R                          | 0 | N/R | 0 | N/R                     | 0 | N/R                                  | 0 | 4  |
| Foot Self-Care Behaviour (FSCB) questionnaire                                            |                                                                                              |   |                                                                 |   |                                                               |   |                                            |   |                             |   |                                            |   |                              |   |     |   |                         |   |                                      |   |    |
| The use of FSCB in Australia [56]                                                        | Refer to original study [34]                                                                 | 2 | 119 people with type 2 diabetes at low risk of developin        | 2 | excellent content validity index (CVI)                        | 2 | N/R                                        | 0 | N/R                         | 0 | N/R                                        | 0 | Cronbach alpha 0.96 and 0.68 | 2 | N/R | 0 | N/R                     | 0 | N/R                                  | 0 | 8  |

|                                      |                                                                                             |   |                         |   |                                      |   |     |     |     |     |     |     |     |                       |                       |     |     |             |     |            |     |    |   |
|--------------------------------------|---------------------------------------------------------------------------------------------|---|-------------------------|---|--------------------------------------|---|-----|-----|-----|-----|-----|-----|-----|-----------------------|-----------------------|-----|-----|-------------|-----|------------|-----|----|---|
| The use of FSCB in Australia [57]    | a self-report questionnaire derived from a tool developed by Vileikyte and colleagues       | 2 | 96 people with diabetes | 2 | N/R                                  | 0 | N/R | 0   | N/R | 0   | N/R | 0   | N/R | 0                     | N/R                   | 0   | 4   |             |     |            |     |    |   |
| The Foot Self-Care Observation Guide |                                                                                             |   |                         |   |                                      |   | 1   | N/R | 0   | N/R | 0   | N/R | 0   | Cronbach's alpha 0.68 | 1                     | N/R | 0   | test-retest | 2   | pilot test | 2   | 10 |   |
| Original study [35]                  | developed for this study to reflect the content of American Diabetes Association guidelines | 2 | 144                     | 2 | A podiatrist reviewed the instrument | 0 | N/R | 0   | N/R | 0   | N/R | 0   | N/R | 0                     | Cronbach's alpha 0.83 | 2   | N/R | 0           | N/R | 0          | N/R | 0  | 6 |
| Gökdeniz & Sahin 2020 [59]           | Refer to original study [35]                                                                | 2 | 120                     | 2 | N/R                                  | 0 | N/R | 0   | N/R | 0   | N/R | 0   | N/R | 0                     | Cronbach's alpha 0.83 | 2   | N/R | 0           | N/R | 0          | N/R | 0  | 6 |
