# Supplementary material for: How to Measure Foot Self-Care? A Methodological Review of Instruments
Source: MDPI journal article supplement (doi:10.3390/jpm13030434), 2023-02-28
Supplement: s1 [file s1]

**Supplementary Table 1.** Descriptive information about the instruments included in the review.

| Instrument                                                                          | Measurement aim                                           | Number of items, subscales/parts                                                                                                                                                                                                                                                | Scoring                                                                                               | Interpretation                                                         | Original study |           | Studies using the instrument                                  |                                                    |
|-------------------------------------------------------------------------------------|-----------------------------------------------------------|---------------------------------------------------------------------------------------------------------------------------------------------------------------------------------------------------------------------------------------------------------------------------------|-------------------------------------------------------------------------------------------------------|------------------------------------------------------------------------|----------------|-----------|---------------------------------------------------------------|----------------------------------------------------|
|                                                                                     |                                                           |                                                                                                                                                                                                                                                                                 |                                                                                                       |                                                                        | Country        | Reference | Country                                                       | Reference                                          |
| Diabetes foot self-care behavior scale (DFSBS)                                      | measures frequency of foot self-care behavior             | 7 items and 2 parts: Part 1) behavior of the participants over one week, 2) frequency of the behaviors exhibited by the participants                                                                                                                                            | 5-point Likert scale                                                                                  | A higher score indicates better performance of foot self-care behavior | Taiwan         | [30]      | Iran<br>China,<br>State of Palestine<br>Malaysia<br>Turkey    | [37,45]<br>[36]<br>[38,39]<br>40]                  |
| the Summary of Diabetes Self - Care Activities:foot care (SDSCA)                    | to evaluate self-care behaviour in patients               | 5 items to identify the number of days in the past week that they performed positive foot care practices (washed their feet, dried between their toes after washing, checked their feet, and inspected the inside of their shoes) or negative foot care practices (soaked feet) | Scaling from 0 to 7 based on the number of days in which the participants indicated their performance | The higher the score, better the foot self-care behaviour              | USA            | [31]      | China<br>Canada,<br>USA<br>Tanzania<br>Brazil<br>South Africa | [46]<br>[47]<br>[48,50]<br>[12]<br>[49,51]<br>[41] |
| the Nottingham Assessment of Functional Footcare                                    | to assess the foot care behaviour of people with diabetes | 29 items: foot care, types of suitable shoes, types of socks, avoiding walking bare foot                                                                                                                                                                                        | Categorical scale (scored 0 to 3) according to the frequency of occurrence of the behaviour           | The higher the calculated sum the better foot self-care                | UK             | [32]      | USA<br>Philippines<br>Guyana<br>Egypt                         | [52]<br>[53]<br>[54]<br>[43]                       |
| Diabetic foot self-care questionnaire of the University of Malaga, Spain (DFSQ-UMA) | to evaluate the foot self-care of diabetic patients       | 16 questions in 3 domains: Personal self-care (7 items), Podiatry care (4 items) and Shoes and socks (5 items)                                                                                                                                                                  | 4-point response scale                                                                                |                                                                        | Spain          | [33]      | Spain                                                         | [55]                                               |

|                                                                                                    |                                                                                                                                                                        |                                                                                                                                                   |                                                                                                                                                                                                       |                                                                                                |           |      |           |         |
|----------------------------------------------------------------------------------------------------|------------------------------------------------------------------------------------------------------------------------------------------------------------------------|---------------------------------------------------------------------------------------------------------------------------------------------------|-------------------------------------------------------------------------------------------------------------------------------------------------------------------------------------------------------|------------------------------------------------------------------------------------------------|-----------|------|-----------|---------|
| Foot Self-Care Behaviour (FSCB) questionnaire                                                      | To measure foot-care behaviour                                                                                                                                         | 17 items in two subscales: Preventive Foot Self-Care (9 items), Potentially Foot – Damaging Behaviour (8 items)                                   | 2 different rating scales: a 6 point-scale (i.e. twice a day, daily, every other day, twice a week, once a week or never) and a 4 point-scale (i.e. always, most of the time, occasionally, or never) | A higher score indicates more preventive and potentially damaging behaviours respectively      | UK        | [34] | Australia | [56–58] |
| The Foot Self-Care Observation Guide                                                               | an objective measurement for the RA who was observing and scoring the foot self-exam components                                                                        | 16 items: Foot care (5 items), Foot check (3 items), Foot safety (8 items)                                                                        | 1 = never, 2 = occasionally, 3 = sometimes, 4 = frequently, and 5 = always.                                                                                                                           | Range 15–75. Higher scale score indicates that the individual has better self-care behavior    | USA       | [35] | Turkey    | [59]    |
| The Foot Care Knowledge and Practice Questionnaire                                                 | N/R                                                                                                                                                                    | 15 questions on knowledge and 15 questions on practice                                                                                            | yes-no                                                                                                                                                                                                |                                                                                                | Mexico    | [60] |           |         |
| Modified Diabetic Foot Care Behaviors                                                              | Foot self-care behavior                                                                                                                                                |                                                                                                                                                   |                                                                                                                                                                                                       |                                                                                                | Indonesia | [61] |           |         |
| Frankfurter Catalogue of Foot Self-Care – Prevention of the Diabetic Foot Syndrome VS. 1.0 (FCFSP) | The FCFSP asks for the health deviation self-care activities for the prevention of diabetic foot syndrome and is based on the Self-Care Deficit Nursing Theory of Orem | 19 items in three domains: 1: professional assistance in foot care; 2: self-control of the feet; 3: self-control of shoes and socks.              | 5-point Likert-scale with a verbal characterisation of the frequency (never, rare, some of the time, most of the time, all the time)                                                                  |                                                                                                | Germany   | [62] |           |         |
| Foot self-care behaviour (FSCB)                                                                    | foot self-care behavior                                                                                                                                                | 16 items in two sections: 1: how many days the respondents had performed the foot self-care behaviour in the past seven days (one week, 7 items). | 5-point Likert-type scale.                                                                                                                                                                            | Higher scores representing better foot self-care behaviours. The total score ranged from 16±80 | Malaysia  | [63] |           |         |

|                                                                                     |                                                        |                                                                                                                                                                                            |                                                                                                           |                                                                                                                                                                                                                     |         |      |  |  |
|-------------------------------------------------------------------------------------|--------------------------------------------------------|--------------------------------------------------------------------------------------------------------------------------------------------------------------------------------------------|-----------------------------------------------------------------------------------------------------------|---------------------------------------------------------------------------------------------------------------------------------------------------------------------------------------------------------------------|---------|------|--|--|
|                                                                                     |                                                        | 2: the frequency in which respondents performed certain foot self-care behaviour (9 items)                                                                                                 |                                                                                                           |                                                                                                                                                                                                                     |         |      |  |  |
| Foot Self-Care Activities Structured Interview                                      | measures the foot self-care behaviours of older people | 16 items in three subscales:<br>1) general foot self-care (8 items),<br>2) prevention of foot problems (4 items)<br>3) self-care of foot problems (4 items)                                | multiple-choice response options                                                                          |                                                                                                                                                                                                                     | Finland | [64] |  |  |
| Diabetes Foot Disease and Foot Care Questionnaire (DFDFC-Q)                         | measures foot self-care in diabetic patients           | 12 items in 6 domains: sociodemographic characteristics, diabetes-related foot disease, foot self-care, footwear, foot care education, and professional foot care                          | never (0 points), rarely (1 point), once a month (2 points), once a week (3 points), or daily (4 points). | Overall foot selfcare quality score maximum 48 points. Four self-care quality levels are identified: good (37 to 48 points), moderate (25 to 36 points), poor (13 to 24 points), and very poor (12 or fewer points) | Poland  | [65] |  |  |
| Self-foot care Questionnaire                                                        | N/R                                                    | N/R                                                                                                                                                                                        | N/R                                                                                                       |                                                                                                                                                                                                                     | India   | [66] |  |  |
| structured diabetic foot knowledge and practice scoring questionnaire (DiFoKaPS-32) | to measure the subjects' care level of their feet.     | 16 items: foot self-examination (4 items), footwear (3 items), care of the toenails (2 items), foot hygiene (7 items)                                                                      | Questions with multiple choice answers were used.                                                         |                                                                                                                                                                                                                     | Iran    | [67] |  |  |
| Foot Care History and Assessment of the Feet                                        | N/R                                                    | 106 item form was developed: 15 demographic and personal health history items; 18 items related to the foot care practices; and 67 assessment items on the condition of the patient's feet | N/R                                                                                                       |                                                                                                                                                                                                                     | USA     | [68] |  |  |

|                                                                       |                                                                                                                                                                                   |                                                 |                                                                            |                                                                            |                      |      |  |  |
|-----------------------------------------------------------------------|-----------------------------------------------------------------------------------------------------------------------------------------------------------------------------------|-------------------------------------------------|----------------------------------------------------------------------------|----------------------------------------------------------------------------|----------------------|------|--|--|
| Self-care behavior questionnaire based on the EPPM                    | N/R                                                                                                                                                                               | four constructs                                 | N/R                                                                        |                                                                            | Iran                 | [69] |  |  |
| Foot Care Practices Questionnaire                                     | to assess participant's current foot self-care practices                                                                                                                          | 7 items                                         | 4 multiple response choices                                                |                                                                            | USA                  | [70] |  |  |
| Foot Self-Care Behavior Questionnaire                                 | Performance of foot self-care behaviors                                                                                                                                           | 11 items                                        | yes (1) and no (0). The total scale scores ranged from 0 to 11;            | higher scores indicated performance of most foot self-care behaviors       | Canada               | [71] |  |  |
| the Diabetic Foot Self-care Behavior Scale                            | evaluating the foot self-care behaviour in diabetic patients.                                                                                                                     | 17 items                                        | 4-point Likert scale (1 = never, 2 = sometimes, 3 = often and 4 = always). | Total score range 0–100. A higher score represents a better foot self-care | China                | [72] |  |  |
| “diabetes foot care scale”                                            | N/R                                                                                                                                                                               | 20 items                                        | 5 points for each item for a total of 100 points                           |                                                                            | China                | [73] |  |  |
| Diabetes Care Program of Nova Scotia Diabetes Foot Care Questionnaire | N/R                                                                                                                                                                               | 6 items                                         | yes/no                                                                     |                                                                            | United Arab emirates | [74] |  |  |
| Veterans Health Administration Footcare Survey                        | assessed demographic, general health, diabetes and foot self-care information, barriers to foot self-care, receipt of professional foot care, and satisfaction with current care. | 9 items                                         |                                                                            |                                                                            | USA                  | [75] |  |  |
| Foot Care Scale for Older Diabetics (FCS-OD)                          | the ability of older patients with diabetes to self-manage their foot care                                                                                                        | 9 items (short version) 22 items (long version) | Likert 1-5 (1=very untrue of me - 5=very true of me)                       |                                                                            | Japan                | [76] |  |  |

|                                                                       |                                                                                                                                                                                                                           |                                                                                                                                                       |                                                                                             |                                                                                                                                                                                                                                                       |                     |      |  |  |
|-----------------------------------------------------------------------|---------------------------------------------------------------------------------------------------------------------------------------------------------------------------------------------------------------------------|-------------------------------------------------------------------------------------------------------------------------------------------------------|---------------------------------------------------------------------------------------------|-------------------------------------------------------------------------------------------------------------------------------------------------------------------------------------------------------------------------------------------------------|---------------------|------|--|--|
| KAP questionnaire                                                     | questions about diabetic foot                                                                                                                                                                                             | 10 items to evaluate participants' foot care knowledge, 5 items to assess their attitude toward foot care, 8 items to assess their foot care practice | yes/no, in some items multiple choice options                                               |                                                                                                                                                                                                                                                       | St. Kitts and Nevis | [77] |  |  |
| Foot Care Confidence/Foot-Care Behavior Scale For Diabetes (FCCS-FCB) | to measure foot care                                                                                                                                                                                                      | preventive behaviors (six items) and potentially damaging behaviors (11 items)                                                                        |                                                                                             | Preventive behaviors score range 6–36, high score means the non-observance of preventive behaviors in foot care.<br>Potentially damaging behaviors score range 11– to 44, the higher this score, the more harmful will be the behaviors in foot care. | Iran                | [78] |  |  |
| "no name"                                                             | foot self-care was assessed                                                                                                                                                                                               | 4 items                                                                                                                                               | yes-no                                                                                      |                                                                                                                                                                                                                                                       | Brazil              | [79] |  |  |
| "no name"                                                             | The questions regarding foot risk factors, self-care behaviors, and education were taken from two instruments, the Diabetes Patient Outcome Research Team Survey and the VA's Diabetes Quality Improvement Project Survey |                                                                                                                                                       |                                                                                             |                                                                                                                                                                                                                                                       | USA                 | [80] |  |  |
| "no name"                                                             | ...using selfreports addressing recommended foot self-care among diabetic patients...                                                                                                                                     | 4 questions                                                                                                                                           | from "0 days" meant (foot self-care was never performed during the past week), and "7 days" |                                                                                                                                                                                                                                                       | Iran                | [81] |  |  |

|                                                                                           |                                                                                                                                                              |                                                                                                                                                                                                                                        |                                                                                                                                                                                       |                                                                                                       |          |      |  |  |
|-------------------------------------------------------------------------------------------|--------------------------------------------------------------------------------------------------------------------------------------------------------------|----------------------------------------------------------------------------------------------------------------------------------------------------------------------------------------------------------------------------------------|---------------------------------------------------------------------------------------------------------------------------------------------------------------------------------------|-------------------------------------------------------------------------------------------------------|----------|------|--|--|
|                                                                                           |                                                                                                                                                              |                                                                                                                                                                                                                                        | meant (foot self-care done every day during the past week)                                                                                                                            |                                                                                                       |          |      |  |  |
| "no name"                                                                                 | Knowledge and practice on patients with DM on diabetic foot self-care                                                                                        | 16 items (8 for knowledge, 8 for practice)                                                                                                                                                                                             |                                                                                                                                                                                       |                                                                                                       | Ethiopia | [82] |  |  |
| "no name"                                                                                 | pre-validated questionnaire was used based on the guidelines from The International Working Group on the diabetic Foot and International Diabetes Federation | 16 questions, each for knowledge and practice. Questions were asked about daily inspection and washing, proper drying of feet, especially in between the toes, bursting of blisters, care of minor cuts, maintaining water temperature | For most questions yes/no with scores 1 and 0, some items to show the frequency of the task scores ranged from 0 to 4. The cumulative score was 16 for knowledge and 25 for practice. | Interpretation for practice: good practice, 21–25; moderate practice, 14–20; and poor practice, 0–13. | Pakistan | [83] |  |  |
| "no name"<br>A validated questionnaire in English developed by Hasnain et al. was adopted | to assess the level of foot care knowledge and self-care practices among the respondents                                                                     | 15 items                                                                                                                                                                                                                               | 'yes' or 'no' questions regarding foot care knowledge and foot self-care practices. Each correct answer was given one mark.                                                           | Higher scores signified better foot care knowledge and foot self-care practices.                      | Malaysia | [84] |  |  |
